# Supplementary material for: Improved Differentiation of Benign and Malignant Breast Tumors with Multiparametric 18Fluorodeoxyglucose Positron Emission Tomography Magnetic Resonance Imaging: A Feasibility Study
Source: Oxford University Press journal article supplement (doi:10.1158/1078-0432.ccr-13-2810), 2014-06-24
Supplement: 10780432ccr132810-sup-116578_1_supp_2376993_n2z2l7.docx [file 10780432ccr132810-sup-116578_1_supp_2376993_n2z2l7.docx]

Supplemental Data:

Table S3

Detailed histopathological results of false-negative and false-positive lesions

|  |  | **False positives** | **n** | **False negatives** | **n** |
| --- | --- | --- | --- | --- | --- |
| **single parameter** | **CE-MRI** | 1 FA | **6** | 1 Metastases | **1** |
| 1 DH without atypia |  |  |  |
| 2 Other |  |  |  |
| 2 High risk |  |  |  |
| **DWI** | 3 Other | **3** | 1 Mucinous carcinoma | **2** |
| 1 High risk |  | 1 IDC |  |
| **3D 1H-MRSI** | 1 FA | **2** | 5 IDC | **9** |
| 1 Other |  | 3 ILC |  |
|  |  | 1 DCIS |  |
| **18FDG-PET** | 3 FA | **8** | 1 IDC | **1** |
| 4 Other |  |  |  |
| 1 High risk |  |  |  |
| **two parameters** | **DCE-MRI, DWI** | 4 Other | **8** |  | **0** |
| 1 High risk |  |  |  |
| 2 FA |  |  |  |
| 1 DH without atypia |  |  |  |
| **DCE-MRI, 3D 1H-MRS** | 3 FA | **8** |  | **0** |
| 3 Other |  |  |  |
| 1 High risk |  |  |  |
| 1 DH without atypia |  |  |  |
| **DCE-MRI, 18FDG-PET** | 4 FA | **10** |  | **0** |
| 4 Other |  |  |  |
| 1 High risk |  |  |  |
| 1 DH without atypia |  |  |  |
| **MP MRI with three parameters** | **DCE-MRI, DWI, 3D 1H-MRSI,** | 2 Other | **3** |  | **0** |
| 1 High risk |  |  |  |
| **MP 18FDGPET-MRI** | **DCE-MRI, DWI, 3D 1H-MRSI, 18FDG PET** | 2 Other | **3** |  | **0** |
| 1 High risk |  |  |  |

Note- DCE MRI=dynamic contrast-enhanced MR imaging

DWI= diffusion-weighted imaging

3D 1H-MRSI= three-dimensional proton magnetic resonance spectroscopy

18FDG-PET= 18Fluorodeoxyglucose positron emission tomography

MP MRI= multiparametric magnetic resonance imaging

MP 18FDG PET-MRI= multiparametric 18Fluorodeoxyglucose positron emission tomography - magnetic resonance imaging

IDC=invasive ductal carcinoma

ILC= invasive lobular carcinoma

DCIS= ductal carcinoma in situ

FA= fibroadenoma
